# Supplementary material
Source: HighWire-hosted journal article supplement (doi:10.1101/rna.076489.120)
Supplement: Supplemental_Table_S3.xlsx [file Supplemental_Table_S3.xlsx]

## Sheet: Sheet1
Table S3. Data used for comparison between different tRNA quantification methods.
references			This study	Pang et al.	Tuller et al.	Cozen et al.		Jacob et al.	Ikemura
amino	anticodon	gene	OTTER	tRNA-seq	microarray	ARM-seq		MST	2D-PAGE
						-AlkB	+AlkB
Ala	UGC	5	0.16	12742.7	11549	519.766	420.298	-	-
Ala	AGC	11	0.426	17781.9	32062.5	5623.21	3747.19	3.57346	0.95
Arg	CCG	1	0.038	630.6	6556.56	300.139	246.133	-	-
Arg	CCU	1	0.049	790.09	5019.96	1070.45	1151.3	-	-
Arg	ACG	6	0.166	234.07	25143.1	118.815	792.954	1.46187	0.22
Arg	UCU	11	0.369	5275.15	48752.6	501.418	1717.74	3.16738	0.9
Asn	GUU	10	0.226	8491.68	52475.4	73.0375	255.804	2.43645	-
Asp	GUC	16	0.73	37648.4	52981.9	9775.64	8224.03	2.92374	1.32
Cys	GCA	4	0.062	117103	40897.9	904.499	6182.09	0.893365	0.39
Gln	CUG	1	0.328	11.09	-	202.581	796.472	-	-
Gln	UUG	9		619.5	42204.2	879.49	6384.71	1.46187	-
Glu	CUC	2	0.42	1588.3	-	490.892	367.543	-	-
Glu	UUC	14		9951.62	60511.5	2145.44	1525.49	1.94916	0.96
Gly	CCC	2	0.051	5850.12	9820.93	423.983	412.251	-	-
Gly	UCC	3	0.118	153696	29981.6	347.497	259.162	0.97458	-
Gly	GCC	16	0.592	179044	33639.5	30888.1	22630.3	2.76131	1.41
His	GUG	7	0.219	68315.9	40780.1	2491.76	2836.35	1.29944	-
Ile	UAU	2	0.083	1263.52	19122.8	51.4499	100.258	-	-
Ile	AAU	13	0.462	23572.2	53246.3	95.4514	758.954	3.65468	-
Leu	GAG	1	0.03	30.15	6194.44	9.14088	34.1855	-	-
Leu	UAG	3	0.156	455.7	31179.4	960.414	8348.43	-	0.47
Leu	UAA	7	0.244	8105.82	23734.4	462.191	514.868	1.6243	-
Leu	CAA	9	0.392	8884.43	48012.8	1467.43	1254.59	-	1
Lys	UUU	7	0.201	105.52	37312.1	14.1407	164.323	1.54309	0.35
Lys	CUU	14	0.41	597.12	35075.6	1317.23	1339.9	2.84253	0.79
Met	CAU_i	5	0.121	606.37	32745.4	13.5651	30.6068	1.13701	0.31
Met	CAU_e	5	0.107			35.3176	400.152	1.0558	-
Phe	GAA	10	0.28	974.16	39612.9	538.605	2079.73	-	0.76
Pro	AGG	2	0.374	789.32	7394.17	62.1364	153.438	2.76131	-
Pro	UGG	10		11967.4	56197.1	59.1606	831.15		-
Ser	GCU	3	0.138	66.48	26069.6	204.135	949.886	-	-
Ser	CGA	1	0.156	22.59	20893.4	112.77	863.892	-	0.38
Ser	UGA	3		257.85	25122.6	1602.71	1202	-
Ser	AGA	11	0.305	295589	42364.8	1253.26	916.971	2.92374	1.17
Thr	CGU	1	0.08	4259.17	8071.04	20.2622	76.9114	-	-
Thr	UGU	4	0.186	2178.47	22636.4	529.813	2781.26	-	-
Thr	AGU	11	0.393	1318.6	26190	95.3992	1822.48	4.38561	0.91
Trp	CCA	6	0.179	10839	28472	88.5426	334.929	0.81215	0.61
Tyr	GUA	8	0.28	650.3	47627.1	501.267	1568.04	1.78673	0.89
Val	CAC	2	0.082	736.46	22094.5	652.283	962.176	-	0.15
Val	UAC	2	0.073	363.71	15701.4	34.9963	216.65	-	-
Val	AAC	14	0.418	6180.36	42907	502.342	3336.39	5.60384	1.01
Red numbers, data not used for the comparison between the methods; blue numbers, data used as a sum of isoacceptors in the same tRNA isotype for the comparison.
